# Supplementary material
Source: publisher figshare collection journal article supplement (https://acs.figshare.com/ndownloader/files/4049191)
Supplement: Supplementary file 1 [file 4049191]

## Supporting Information

# **Spatially explicit multi-objective optimisation for the strategic design of first and second generation biorefineries including carbon and water footprints**

Andrea Bernardi, Sara Giarola, and Fabrizio Bezzo\*

*CAPE-Lab – Computer-Aided Process Engineering Laboratory  
Department of Industrial Engineering, Università di Padova,  
via Marzolo 9, 35131, Padova*

---

\* To whom all correspondence should be addressed. Fax no. +39.049.827.5461. E-mail: [fabrizio.bezzo@unipd.it](mailto:fabrizio.bezzo@unipd.it)

The supporting information comprises the economic formulation used in the model following Giarola *et al.* (2011) (for more details see the original reference). The values of some critical parameters used in the model is also reported in Tables S1-S3.

The modelling framework is summarised as follows.

- Annual cash flow

$$CF_t = PBT_t + D_t - TAX_t, \quad \forall t \quad (A.1)$$

- Gross profits

$$PBT_t = Inc_t - VarC_t - FixC_t - D_t, \quad \forall t \quad (A.2)$$

$$Inc_t = \sum_g \sum_k \sum_j P_{j,k,g,t}^T \cdot MP_j, \quad \forall t \quad (A.3)$$

- Fixed costs

$$D_t = \sum_p \sum_k \sum_g \lambda_{p,k,g,t} CI_{k,p} \cdot dk_t, \quad \forall t \quad (A.4)$$

$$FixC_t = \phi \cdot Inc_t, \quad \forall t \quad (A.5)$$

- Variable costs

$$VarC_t = BPC_t + TCb_t + TCf_t + EPC_t, \quad \forall t \quad (A.6)$$

$$BPC_t = \sum_g \sum_i Pb_{i,g,t} \cdot UPC_{i,g}, \quad \forall t \quad (A.7)$$

$$TCb_t = \sum_{i,m} UTC_m \cdot \left( \sum_{g,g'} Qb_{i,g,m,g',t} \cdot LD_{g,g'} \cdot \tau_{g,m,g'} \right) + \sum_{i,g} UTC^* \cdot Pb_{i,g,t} \cdot LD_{g,g'}, \quad \forall t \quad (A.8)$$

$$TCf_t = \sum_{i,m} UTC_m \cdot \left( \sum_{g,g'} Qf_{g,m,g',t} \cdot LD_{g,g'} \cdot \tau_{g,m,g'} \right), \quad \forall t \quad (A.9)$$

$$EPC_t = \sum_k coef_{slope',k} \cdot \sum_g P_{ethanol',k,g,t}^T + coef_{intercept',k} \cdot \sum_g Y_{g,k,t}, \quad \forall t \quad (A.10)$$

- Taxation

$$TAX_t \geq Tr \cdot PBT_t, \quad \forall t \quad (A.11)$$

$$TAX_t \geq 0, \quad \forall t \quad (A.12)$$

- Capacity planning constraints

$$PCap^{\min} \cdot Y_{k,g,t} \leq P_{ethanol',k,g,t}^T \leq \sum_p \lambda_{p,k,g,t} \cdot 3 \cdot ER_p, \quad \forall k, g, t \quad (A.13)$$

$$Db_{i,g,t} = \sum_k \frac{Pf_{i,k,g,t}}{\gamma_i} \cdot (1 + burn_{i,k}), \quad \forall i, g, t \quad (A.14)$$

- Sustainability constraints

$$Pb_{i,g,t} \leq BA_{g,i}, \quad \forall i, g, t \quad (A.15)$$

$$BA_{g,i} = GS_g \cdot BY_{i,g} \cdot AD_g \cdot BCD_g^{\max}, \quad \forall g, i \quad (A.16)$$

$$TPot_{i,t} \cdot quota_i \geq \sum_g Pb_{i,g,t} \cdot IBF_g, \quad \forall i, t \quad (A.17)$$

$$TPot_{i,t} = \sum_g BA_{i,g} \cdot IBF_g, \quad \forall i, t \quad (A.18)$$

- Production constraints

$$Pf_{i,k,g,t} = P_{ethanol',k,g,t}^T \cdot \beta_{i,k}, \quad \forall i, k, g, t \quad (A.19)$$

$$P_{ethanol',k,g,t}^T = \sum_i Pf_{i,k,g,t}, \quad \forall k, g, t \quad (A.20)$$

$$P_{DDGS,k,g,t}^T = Pf_{corn',k,g,t} \cdot \delta, \quad \forall k, g, t \quad (A.21)$$

$$P_{power',k,g,t}^T = P_{ethanol',k,g,t}^T \cdot \frac{\omega_k}{\rho}, \quad \forall k, g, t \quad (A.22)$$

- Capital costs linearisation constraints

$$TCI_t = \sum_p \sum_k \sum_g \lambda_{p,k,g,t}^{plan} \cdot CI_{k,p}, \quad \forall t \quad (A.23)$$

$$D_t = \sum_p \sum_k \sum_g \lambda_{p,k,g,t} \cdot CI_{k,p} \cdot dk_t, \quad \forall t \quad (A.24)$$

$$\lambda_{p,k,g,t} = \lambda_{p,k,g,t-1} + \lambda_{p,k,g,t}^{plan}, \quad \forall k, g, t, p \quad (A.25)$$

$$\lambda_{p,k,g,t} - y_{p-1,k,g,t} - y_{p,k,g,t} \leq 0, \quad \forall k,g,t, p \in \text{sub}(p) \quad (\text{A.26})$$

$$\lambda_{p,k,g,t}^{plan} - y_{p-1,k,g,t} - y_{p,k,g,t} \leq 0, \quad \forall k,g,t, p \in \text{sub}(p) \quad (\text{A.27})$$

$$y_{p,k,g,t} = 0, \quad \forall k,g,t, p = 6 \quad (\text{A.28})$$

$$\sum_{p=1}^{P-1} y_{p,k,g,t} = Y_{k,g,t}, \quad \forall k,g,t \quad (\text{A.29})$$

$$\sum_p \lambda_{p,k,g,t} = Y_{k,g,t}, \quad \forall k,g,t \quad (\text{A.30})$$

$$\sum_p \lambda_{p,k,g,t}^{plan} = Y_{k,g,t}^{plan}, \quad \forall k,g,t \quad (\text{A.31})$$

- Planning constraints

$$Y_{k,g,t} = Y_{k,g,t-1} + Y_{k,g,t}^{plan} \quad \forall k,g,t \quad (\text{A.32})$$

$$Y_{k,g,1}^{plan} = Y_{k,g}^{start} \quad \forall k,g \quad (\text{A.33})$$

$$\sum_k Y_{k,g,t} = 1 \quad \forall g,t \quad (\text{A.34})$$

**Table S1.** values for water consumption (direct contribution) related to corn cultivation,  
 $f_{'corn','bp'}^{WF} \cdot [m^3/t_{com}]$

| $g$ | $f_{'corn','bp'}^{WF}$ | $g$ | $f_{'corn','bp'}^{WF}$ | $g$ | $f_{'corn','bp'}^{WF}$ |
|-----|------------------------|-----|------------------------|-----|------------------------|
| 1   | 79.96                  | 21  | 68.91                  | 41  | 155.73                 |
| 2   | 79.96                  | 22  | 63.47                  | 42  | 150.18                 |
| 3   | 79.96                  | 23  | 39.46                  | 43  | 158.71                 |
| 4   | 49.93                  | 24  | 118.61                 | 44  | 142.96                 |
| 5   | 35.93                  | 25  | 127.78                 | 45  | 157.54                 |
| 6   | 35.93                  | 26  | 140.51                 | 46  | 179.12                 |
| 7   | 64.63                  | 27  | 135.18                 | 47  | 179.25                 |
| 8   | 81.65                  | 28  | 115.50                 | 48  | 171.93                 |
| 9   | 71.94                  | 29  | 117.43                 | 49  | 181.07                 |
| 10  | 42.12                  | 30  | 106.79                 | 50  | 187.29                 |
| 11  | 52.62                  | 31  | 106.59                 | 51  | 180.57                 |
| 12  | 57.40                  | 32  | 105.97                 | 52  | 174.38                 |
| 13  | 51.49                  | 33  | 132.07                 | 53  | 0.00                   |
| 14  | 49.93                  | 34  | 78.40                  | 54  | 213.97                 |
| 15  | 87.87                  | 35  | 124.70                 | 55  | 177.18                 |
| 16  | 71.18                  | 36  | 130.78                 | 56  | 184.96                 |
| 17  | 42.16                  | 37  | 191.57                 | 57  | 192.73                 |
| 18  | 100.59                 | 38  | 171.05                 | 58  | 173.99                 |
| 19  | 86.61                  | 39  | 173.18                 | 59  | 173.99                 |
| 20  | 83.49                  | 40  | 170.07                 | 60  | 116.25                 |

**Table S2.** *water consumption related to biomass and ethanol transportation*

| <i>Transport mode</i> | <i>Water consumption</i><br><i>(<math>L_{H_2O}/(t_{trans} * km)</math>)</i> |
|-----------------------|-----------------------------------------------------------------------------|
| small truck           | 3.10E-02                                                                    |
| truck                 | 6.42E-03                                                                    |
| train                 | 1.10E-03                                                                    |
| barge                 | 4.52E-04                                                                    |
| ship                  | 3.32E-04                                                                    |
| trans ship            | 3.14E-04                                                                    |

**Table S3.** Parameters  $\omega_k$  and  $ec_k^{WF}$  representing the biomass-to-power conversion yields and the credits for avoided impact on water resources achieved by each technology  $k$ .

| technology | $\omega_k$                  | $ec_k^{WF}$                                                       |
|------------|-----------------------------|-------------------------------------------------------------------|
| $k$        | [kWh/L <sub>ethanol</sub> ] | [m <sup>3</sup> <sub>H<sub>2</sub>O</sub> /t <sub>ethanol</sub> ] |
| 1          | 0                           | 170.5                                                             |
| 2          | 0.743                       | 13.7                                                              |
| 3          | 0.496                       | 179.7                                                             |
| 4          | 0.602                       | 11.1                                                              |
| 5          | 0.482                       | 103.0                                                             |
| 6          | 0.515                       | 74.5                                                              |
| 7          | 0.533                       | 59.5                                                              |
| 8          | 0.482                       | 8.9                                                               |
| 9          | 0.515                       | 9.5                                                               |
| 10         | 0.533                       | 9.9                                                               |

## List of symbols

### Acronyms

|             |                                        |
|-------------|----------------------------------------|
| <i>CHP</i>  | Combined Heat and Power                |
| <i>DDGS</i> | Distiller's Dried Grains with Solubles |
| <i>WF</i>   | Water Footprint                        |

### Sets

|                       |                                                                                                                              |
|-----------------------|------------------------------------------------------------------------------------------------------------------------------|
| $c \in C$             | set of production costs regression coefficients<br>$C = \{slope, intercept\}$                                                |
| $g \in G$             | grid squares, $G = \{1, \dots, 60\}$                                                                                         |
| $g' \in G$            | set of square regions different than $g$                                                                                     |
| $i \in I$             | set of biomass typology, $I = \{corn, stover\}$                                                                              |
| $j \in J$             | set of product, $J = \{ethanol, DDGS, power\}$                                                                               |
| $k \in K$             | set of conversion technologies, $K = \{1, \dots, 10\}$                                                                       |
| $m \in M$             | set of means of transport, $M = \{truck, rail, barge, ship, tship\}$                                                         |
| $l \in L$             | environmental objective functions, $L = \{CF, WF\}$                                                                          |
| $p \in P$             | set of plant scale index, $P = \{1, \dots, 6\}$                                                                              |
| $s \in S$             | set of life cycle stages, $S = \{bp, bpt, bt, fp, ft\}$                                                                      |
| $t \in T$             | set of time intervals (years), $T = \{1, \dots, 20\}$                                                                        |
| $tech(k) \subset K$   | subset of conversion technologies producing DDGS to be sold,<br>$tech(k) = \{1, 3, 5, 6, 7\}$                                |
| $fratio(k) \subset K$ | subset of conversion technologies using both biomass typology for ethanol production,<br>$fratio(k) = \{5, 6, 7, 8, 9, 10\}$ |



$sub(p) \subset P$  subset of discretisation intervals,  $sub(p)=\{1,...,5\}$

### **Scalars**

$\delta$  DDGS conversion factor [ $t_{DDGS}/t_{ethanol}$ ]  
 $\rho$  ethanol density [kg/L]  
 $Tr$  taxation rate  
 $\phi$  fixed costs over incomes  
 $PCap^{min}$  minimum ethanol production capacity [t/y]

### **Parameters**

$\beta_{i,k}$  fraction of ethanol rate from biomass type  $i$  for each technology  $k$   
 $AD_g$  arable land density [ $km^2_{arable}/km^2_{grid\ surface}$ ]  
 $BA_{g,i}$  biomass  $i$  available for ethanol production in grid  $g$  [t/y]  
 $BCD_g^{max}$  maximum cultivation density in region  $g$  [ $km^2_{cultivation}/km^2_{arable}$ ]  
 $burn_{i,k}$  fraction of biomass  $i$  fed to the CHP station in technology  $k$   
 $BY_{i,g}$  cultivation yields for each biomass  $i$  in grid  $g$  [t/ha]  
 $coef_{c,k}$  coefficients (slope [ $\text{€}/t_{ethanol}$ ], intercept [ $\text{€}$ ]) for linear regression of production costs for technology  $k$   
 $CI_{k,p}$  capital investment at each linearisation interval  $p$  for the conversion technology  $k$  [M€]  
 $dk_t$  depreciation charge at time  $t$   
 $ec_k^l$  credits for avoided emissions of conversion technology  $k$  on climate change [kg CO<sub>2</sub>-eq/t] ( $l = CF$ ) or on water resources [ $m^3_{H_2O}/t$ ] ( $l = WF$ )

|                 |                                                                                                                                                                                                    |
|-----------------|----------------------------------------------------------------------------------------------------------------------------------------------------------------------------------------------------|
| $f_{i,s,g}^l$   | impact factors for biomass $i$ and cell $g$ on climate change [kg CO <sub>2</sub> -eq/t] ( $l = CF$ )<br>or on water resources [ $m^3_{H_2O}/t$ ] ( $l = WF$ ) for biomass production ( $s = bp$ ) |
| $ER_p$          | ethanol production rate for each plant size $p$ [t <sub>EtOH</sub> /year]                                                                                                                          |
| $GS_g$          | grid surface of cell $g$ [km <sup>2</sup> ]                                                                                                                                                        |
| $IBF_g$         | internal biomass production feasibility, binary parameter                                                                                                                                          |
| $\gamma_i$      | conversion of biomass $i$ to ethanol [t <sub>ethanol</sub> /t <sub>biomass</sub> ]                                                                                                                 |
| $LD_{g,g'}$     | local delivery distance between grids $g$ and $g'$ [km]                                                                                                                                            |
| $MP_j$          | market price of product $j$ [€/t] or [€/MWh]                                                                                                                                                       |
| $quota_i$       | maximum quota of collectable biomass $i$ for ethanol production                                                                                                                                    |
| $\tau_{g,m,g'}$ | tortuosity factor of transport mode $m$ between $g$ and $g'$ [-]                                                                                                                                   |
| $UPC_{i,g}$     | unit purchase cost for biomass $i$ in grid $g$ [€/t]                                                                                                                                               |
| $UTC_m$         | unit transport cost via mean $m$ [€/t]                                                                                                                                                             |
| $UTC^*$         | unit transport cost for local transport of biomass [€/t]                                                                                                                                           |
| $\omega_k$      | electricity sold potential of technology $k$ (kWh/L <sub>ethanol</sub> )                                                                                                                           |

### **Continuous variables**

|              |                                                    |
|--------------|----------------------------------------------------|
| $BPC_t$      | biomass purchase cost at time $t$ [€/y]            |
| $CF_t$       | cash flow at time $t$ [€/y]                        |
| $D_t$        | depreciation charge at time $t$ [€/y]              |
| $Db_{i,g,t}$ | biomass $i$ demand in region $g$ at time $t$ [t/y] |
| $EPC_t$      | ethanol production cost at time $t$ [€/y]          |
| $FixC_t$     | fixed costs at time $t$ [€/y]                      |
| $Inc_t$      | gross earnings at time $t$ [€/y]                   |

|                            |                                                                                                   |
|----------------------------|---------------------------------------------------------------------------------------------------|
| $\lambda_{p,k,g,t}$        | linearisation variables for TCI for technology $k$ at interval $p$ in region $g$ at time $t$      |
| $\lambda_{p,k,g,t}^{plan}$ | linearisation variables for TCI for technology $k$ at interval $p$ in region $g$ at time $t$      |
| $Pb_{i,g,t}$               | production rate of biomass $i$ in cell $g$ at time $t$ [t/y]                                      |
| $PBT_t$                    | profit before taxes at time $t$ [€/y]                                                             |
| $Pf_{i,k,g,t}$             | ethanol production rate from biomass $i$ through facility $k$ at time $t$ in grid $g$ [t/y]       |
| $P_{j,k,g,t}^T$            | total production rate for product $j$ through technology $k$ at time $t$ in grid $g$ [t/y]        |
| $Qb_{i,g,m,g',t}$          | flow rate of biomass $i$ between $g$ and $g'$ with transport mode $m$ in time period $t$<br>[t/y] |
| $Qf_{g,m,g',t}$            | ethanol flow rate between $g$ and $g'$ with transport mode $m$ in time period $t$ [t/y]           |
| $TAX_t$                    | tax amount at time $t$ [€/y]                                                                      |
| $TCb_t$                    | biomass transport cost at time $t$ [€/y]                                                          |
| $TCf_t$                    | ethanol transport cost at time $t$ [€/y]                                                          |
| $TCI_t$                    | total capital investment at time $t$ [€]                                                          |
| $TPot_{i,t}$               | total potential production of biomass $i$ at time $t$ [t/y]                                       |
| $VarC_t$                   | variable costs at time $t$ [€/y]                                                                  |

### **Binary variables**

|                    |                                                                                                                               |
|--------------------|-------------------------------------------------------------------------------------------------------------------------------|
| $Y_{k,g,t}$        | 1 if a production facility $k$ is already established in region $g$ at time $t$ , 0 otherwise                                 |
| $Y_{k,g,t}^{plan}$ | 1 if the establishment of a new conversion facilities $k$ is to be planned in region $g$ during time period $t$ , 0 otherwise |
| $Y_{k,g}^{start}$  | 1 if establishment of a new conversion facilities $k$ is to be planned in region $g$ at the beginning, 0 otherwise            |
| $y_{p,k,g,t}$      | supporting variable for linearisation of plant scale                                                                          |
